# Supplementary material for: Development of a Responsible Policy Index to Improve Statutory and Self-Regulatory Policies that Protect Children’s Diet and Health in the America’s Region
Source: PubMed Central journal article supplement (PMC7013653; doi:10.3390/ijerph17020495), 2020-01-13
Supplement: ijerph-17-00495-s001.pdf [file ijerph-17-00495-s001.pdf]

**Supplemental Table S1.** Highest RESPI \* scores for policies that restrict the marketing of HFSS \*\* food and beverage products to children in eight countries in the America’s Region, 2010 to 2019

| Country | Policy Document                                                                                            | Year *** | Policy Characteristics |                 |                           |           |                   |                 |              | Marketing Techniques Covered |                                                             |                  |               |                |                              |                   |             |                 | RESPI *<br>Score |     |
|---------|------------------------------------------------------------------------------------------------------------|----------|------------------------|-----------------|---------------------------|-----------|-------------------|-----------------|--------------|------------------------------|-------------------------------------------------------------|------------------|---------------|----------------|------------------------------|-------------------|-------------|-----------------|------------------|-----|
|         |                                                                                                            |          | Policy type            | Rights approach | Monitoring and evaluation | Sanctions | Nutrient criteria | Age of children | Policy score | Branding                     | Cartoon mascots, licensed and media characters, celebrities | Direct marketing | Point of sale | Premium offers | Product design and packaging | Product placement | Sponsorship | Marketing score |                  |     |
| Chile   | Ley 20.606 Sobre la Composición de los Alimentos y su Publicidad                                           | 2018     | 1                      | 0               | 0.5                       | 0.5       | 1                 | 0               | 1            | 1                            | 1                                                           | 1                | 1             | 1              | 1                            | 1                 | 1           | 1               | 5.0              | 8.0 |
| Brazil  | Resolução-RDC No- 24                                                                                       | 2010     | 1                      | 1               | 0                         | 0.5       | 0.5               | 0               | 1            | 1                            | 1                                                           | 1                | 0             | 1              | 1                            | 0                 | 1           | 3.8             | 7.3              |     |
| Canada  | Guidelines for Food and Beverage Sales in B.C. Schools                                                     | 2013     | 1                      | 0               | 0.5                       | 0.5       | 1                 | 1               | 1            | 1                            | 0                                                           | 0                | 1             | 1              | 0                            | 1                 | 1           | 3.1             | 7.1              |     |
| Uruguay | Rotulado de los alimentos envasados en ausencia del cliente, librados al consumo en el territorio nacional | 2018     | 1                      | 1               | 0.5                       | 0         | 0.5               | 1               | 1            | 0                            | 1                                                           | 0                | 1             | 1              | 1                            | 0                 | 0           | 2.5             | 7.0              |     |
| Ecuador | Reglamento Sanitario Sustitutivo de Etiquetado de Alimentos Procesados para el Consumo Humano              | 2014     | 1                      | 1               | 0.5                       | 0.5       | 1                 | 1               | 1            | 0                            | 1                                                           | 0                | 1             | 0              | 1                            | 0                 | 0           | 1.9             | 6.9              |     |
| Mexico  | Proyecto de Modificación a la Norma Oficial Mexicana NOM-051-SCFI/SSA1-2010                                | 2019     | 1                      | 1               | 0.5                       | 0         | 0.5               | 0               | 1            | 0                            | 1                                                           | 0                | 1             | 1              | 1                            | 0                 | 0           | 2.5             | 6.0              |     |
| Brazil  | Resolução 163 Conanda                                                                                      | 2014     | 1                      | 1               | 0.5                       | 0.5       | 1                 | 1               | 0            | 0                            | 1                                                           | 0                | 0             | 1              | 1                            | 1                 | 0           | 2.5             | 6.5              |     |
| Uruguay | Ley no 19.140 Alimentación Saludable en los Centros de Enseñanza                                           | 2013     | 1                      | 0               | 0.5                       | 0.5       | 1                 | 0               | 1            | 1                            | 0                                                           | 1                | 1             | 1              | 0                            | 0                 | 1           | 3.1             | 6.1              |     |

\* RESPI: Responsible Policy Index (RESPI) to assess the strength of policies that restrict the marketing of HFSS food and beverage products to children. Highest RESPI scores = policies with a score of 6 and above. \*\* HFSS: high in fat, sugar and salt. \*\*\* Year: date of last amendment or modification to the policy. To calculate the RESPI scores three steps were followed: Step 1: Calculate the total points from the component 1 “policy characteristics”. The total points are the sum of the points from each indicator of this component. Step 2: Calculate the total points from the component 2 “marketing techniques”.  $[[\text{total marketing techniques points}] \times 100/8]/20$ . *Exceptions:* if the policy covers the following media channel, platform or setting: Broadcast and print:  $[[\text{total marketing techniques points}] \times 100/6]/20$ ; Outdoors and transportation:  $[[\text{total marketing techniques points}] \times 100/4]/20$ . Step 3: Calculate the overall RESPI score for each policy on the marketing of HFSS food and beverage products to children.  $[\text{total policy characteristics points}] + [\text{total marketing technique points}]$ .

**Supplemental Table S2.** Obesity prevalence for boys and girls aged 5–19 years in 14 countries of the Americas Region, 2016 and predicted by 2030.

| Country               | Obesity Boys<br>5–9 Years<br>2016 (%) | Obesity Girls<br>5–9 Years<br>2016 (%) | Obesity Predicted in<br>Children<br>5–9 Years<br>by 2030 (%) | Obesity Boys<br>10–19 Years<br>2016 (%) | Obesity Girls<br>10–19 Years<br>2016 (%) | Obesity<br>Predicted<br>10–19 Years<br>by 2030 (%) | Children with Obesity 5–19<br>Years Predicted<br>by 2030 |
|-----------------------|---------------------------------------|----------------------------------------|--------------------------------------------------------------|-----------------------------------------|------------------------------------------|----------------------------------------------------|----------------------------------------------------------|
| Argentina             | 25.6                                  | 17.8                                   | 27.2                                                         | 18.3                                    | 10.4                                     | 20.0                                               | 1,262,281                                                |
| Bolivia               | 12.7                                  | 10.8                                   | 18.3                                                         | 8.2                                     | 7.3                                      | 13.6                                               | 600,564                                                  |
| Brazil                | 17.6                                  | 12.4                                   | 22.8                                                         | 10.1                                    | 7.8                                      | 15.7                                               | 1,757,471                                                |
| Canada                | 16.8                                  | 11.5                                   | 18.0                                                         | 13.6                                    | 9.1                                      | 15.0                                               | 1,109,002                                                |
| Chile                 | 21.4                                  | 15.8                                   | 24.8                                                         | 15.6                                    | 11.5                                     | 19.8                                               | 774,647                                                  |
| Colombia              | 9.8                                   | 7.4                                    | 14.4                                                         | 6.3                                     | 6.0                                      | 11.1                                               | 1,583,123                                                |
| Costa Rica            | 16.2                                  | 15.0                                   | 24.2                                                         | 11.0                                    | 10.5                                     | 18.9                                               | 224,250                                                  |
| Dominican<br>Republic | 19.7                                  | 17.4                                   | 27.7                                                         | 13.7                                    | 12.5                                     | 22.0                                               | 719,596                                                  |
| Ecuador               | 13.8                                  | 10.5                                   | 18.9                                                         | 8.9                                     | 7.2                                      | 14.0                                               | 750,556                                                  |
| El Salvador           | 14.2                                  | 15.3                                   | 22.1                                                         | 9.4                                     | 11.1                                     | 17.2                                               | 329,047                                                  |
| Mexico                | 19.9                                  | 15                                     | 23.6                                                         | 15.2                                    | 11.7                                     | 19.3                                               | 6,550,276                                                |
| Peru                  | 12.3                                  | 8.9                                    | 16.1                                                         | 7                                       | 5.8                                      | 10.9                                               | 1,079,543                                                |
| Uruguay               | 20                                    | 14.4                                   | 22.4                                                         | 14.2                                    | 10.0                                     | 17.2                                               | 133,317                                                  |
| USA                   | 25.1                                  | 20.3                                   | 26.3                                                         | 22.3                                    | 19.0                                     | 24.2                                               | 16,986,603                                               |

Source: World Obesity Federation. *Global Atlas on Childhood Obesity*. October 2019. <https://www.worldobesity.org/nlsegmentation/global-atlas-on-childhood-obesity>.
